# Supplementary material for: Trivalent nucleoside-modified mRNA vaccine yields durable memory B cell protection against genital herpes in preclinical models
Source: JCI journal article supplement (doi:10.1172/jci152310), 2021-10-07
Supplement: sd1 [file 1]

Suppl. Table 1. Comparing two with three mRNA immunizations\* when challenged at 1 month

| Outcome                                                             | 2 immunizations    | 3 immunizations    | P value |
|---------------------------------------------------------------------|--------------------|--------------------|---------|
| Serum neutralizing antibody titers $\pm$ SD                         | 1:5,632 $\pm$ 1619 | 1:6,144 $\pm$ 2159 | >0.9999 |
| Vaginal neutralizing antibody titers $\pm$ SD                       | 1:60 $\pm$ 39      | 1:58 $\pm$ 25      | 0.8250  |
| Death                                                               | 0/10 (0%)          | 0/10 (0%)          | >0.9999 |
| Genital lesions d1-48                                               | 0/10 (0%)          | 0/10 (0%)          | >0.9999 |
| Days with genital lesions                                           | 0/440 (0%)         | 0/440 (0%)         | >0.9999 |
| Urinary retention                                                   | 0/10 (0%)          | 0/10 (0%)          | >0.9999 |
| Weight loss >5%                                                     | 0/10 (0%)          | 0/10 (0%)          | >0.9999 |
| No. with positive vaginal swabs day 2                               | 4/10 (40%)         | 6/10 (60%)         | 0.6563  |
| Mean day 2 vaginal virus titers $\log_{10} \pm$ SD                  | 0.67 $\pm$ 1       | 1.36 $\pm$ 1.37    | 0.2783  |
| No. with positive vaginal swabs day 4                               | 1/10 (10%)         | 2/10 (20%)         | >0.9999 |
| Mean day 4 vaginal virus titers $\log_{10} \pm$ SD                  | 0.08 $\pm$ 0.25    | 0.32 $\pm$ 0.77    | 0.4737  |
| No. with vaginal shedding HSV-2 DNA d28-48                          | 1/10 (10%)         | 3/10 (30%)         | 0.5820  |
| Days with vaginal shedding HSV-2 DNA d28-48                         | 1/210 (0.5%)       | 4/210 (1.9%)       | 0.3720  |
| Days with vaginal shedding HSV-2 replication competent virus d28-48 | 0/210 (0%)         | 0/210 (0%)         | >0.9999 |

\*Guinea pigs were immunized twice at months 0 ID and 3 IM, or three times at months 0 and 1 ID and 4 IM. P values for neutralizing titers and vaginal virus titers were calculated using the two-tailed Mann-Whitney test, while the other P values were calculated using the two-tailed Fisher's exact test.

Suppl. Table 2. Comparing ID with IM mRNA immunizations\* when challenged at 8 months

| Outcome                                                             | ID immunization    | IM immunization    | P value |
|---------------------------------------------------------------------|--------------------|--------------------|---------|
| Serum neutralizing antibody titers $\pm$ SD                         | 1:2,688 $\pm$ 1409 | 1:2,560 $\pm$ 1045 | >0.9999 |
| Vaginal neutralizing antibody titers $\pm$ SD                       | 1:13.5 $\pm$ 10.8  | 1:19.5 $\pm$ 14.6  | 0.3159  |
| Death                                                               | 0/10 (0%)          | 0/10 (0%)          | >0.9999 |
| Genital lesions d1-48                                               | 1/10 (10%)         | 2/10 (20%)         | >0.9999 |
| Days with genital lesions                                           | 1/440 (0.2%)       | 3/440 (0.7%)       | 0.6241  |
| Urinary retention                                                   | 1/10 (10%)         | 0/10 (0%)          | >0.9999 |
| Weight loss >5%                                                     | 0/10 (0%)          | 0/10 (0%)          | >0.9999 |
| No. with positive vaginal swabs day 2                               | 8/10 (80%)         | 7/10 (70%)         | >0.9999 |
| Mean day 2 vaginal virus titers $\log_{10} \pm$ SD                  | 2.79 $\pm$ 1.66    | 1.90 $\pm$ 1.63    | 0.2669  |
| No. with positive vaginal swabs day 4                               | 4/10 (40%)         | 4/10 (40%)         | >0.9999 |
| Mean day 4 vaginal virus titers $\log_{10} \pm$ SD                  | 0.99 $\pm$ 1.42    | 0.91 $\pm$ 1.42    | 0.9600  |
| No. with vaginal shedding HSV-2 DNA d28-48                          | 5/10 (50%)         | 6/10 (60%)         | >0.9999 |
| Days with vaginal shedding HSV-2 DNA d28-48                         | 12/210 (5.7%)      | 18/210 (8.6%)      | 0.3436  |
| Days with vaginal shedding HSV-2 replication competent virus d28-48 | 0/210 (0%)         | 0/210 (0%)         | >0.9999 |

\*Guinea pigs were immunized three times ID or IM at months 0, 1, and 2. P values for neutralizing titers and vaginal virus titers were calculated using the two-tailed Mann-Whitney test, while the other P values were calculated using the two-tailed Fisher's exact test.

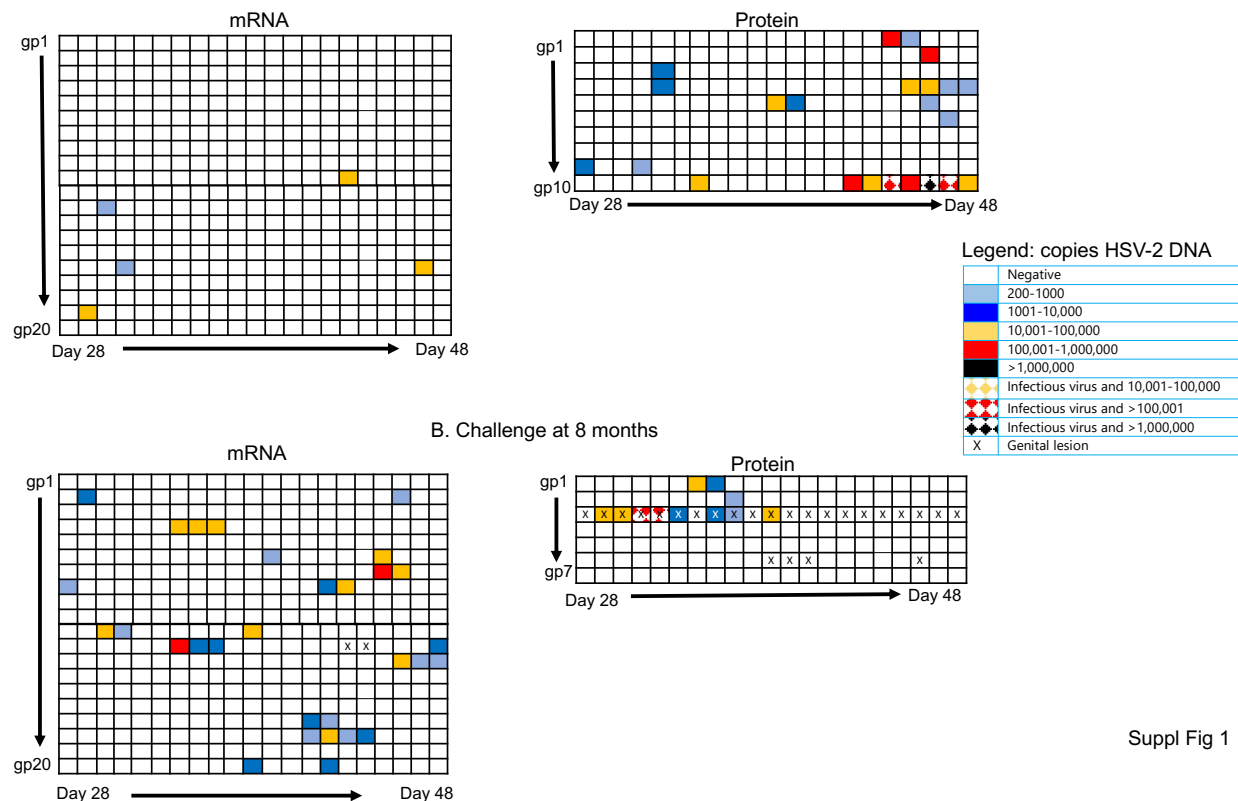

Suppl Fig 1

**Supplementary Figure 1. HSV-2 DNA shedding and virus isolation on days 28 to 48 for each animal in the mRNA and protein groups.** **A.** Guinea pigs in the mRNA (n=20) and protein (n=10) groups were infected one month after the last immunization. **B.** Animals in the mRNA (n=20) and protein (n=10) groups were infected eight months after the last immunization. Vaginal swabs were evaluated for HSV-2 DNA on days 28 to 48. Three of 10 animals in the protein group required humane euthanasia before day 28, leaving only 7 for HSV-2 DNA shedding studies. White boxes indicate no HSV-2 DNA detected. Color boxes indicate HSV-2 DNA was detected. The legend identifies the copy number based on the color. A stippled symbol was used to designate recovery of replication competent virus. Days with genital lesions are marked with an “x”. Each row represents a separate guinea pig (gp) and each column a separate day.

Suppl. Table 3. Animals with latent infection<sup>^</sup>

| Condition                              | mRNA        |              | Protein     |                    |
|----------------------------------------|-------------|--------------|-------------|--------------------|
|                                        | 1 mo.       | 8 mo.        | 1 mo.       | 8 mo. <sup>#</sup> |
| Vaginal shedding HSV-2 DNA d28-48      | 4/20 (20%)  | 11/20 (55%)  | 8/10 (80%)  | 3/7 (43%)          |
| DRG positive HSV-2 DNA                 | 4/20 (20%)  | 5/20 (25%)   | 5/10 (50%)  | 3/7 (43%)          |
| Spinal cord positive HSV-2 DNA         | 4/20 (20%)  | 6/20 (30%)   | 3/10 (30%)  | 5/7 (71%)          |
| HSV-2 DNA detected at one or more site | 7/20 (35%)* | 12/20 (60 %) | 8/10 (80%)* | 6/7 (86%)          |

<sup>^</sup>Latent infection defined as positive HSV-2 DNA or replication competent virus detected in vaginal swabs days 28-48, or HSV-2 DNA detected in DRG or spinal cord at the end of the experiment. <sup>#</sup>The three sickest animals in the protein group at eight months required humane euthanasia prior to day 28; therefore, vaginal shedding, DRG and spinal cords were not evaluated for HSV-2 DNA in these three animals. \*P=0.0502 comparing mRNA with protein at one month by two-tailed Fisher's exact test.

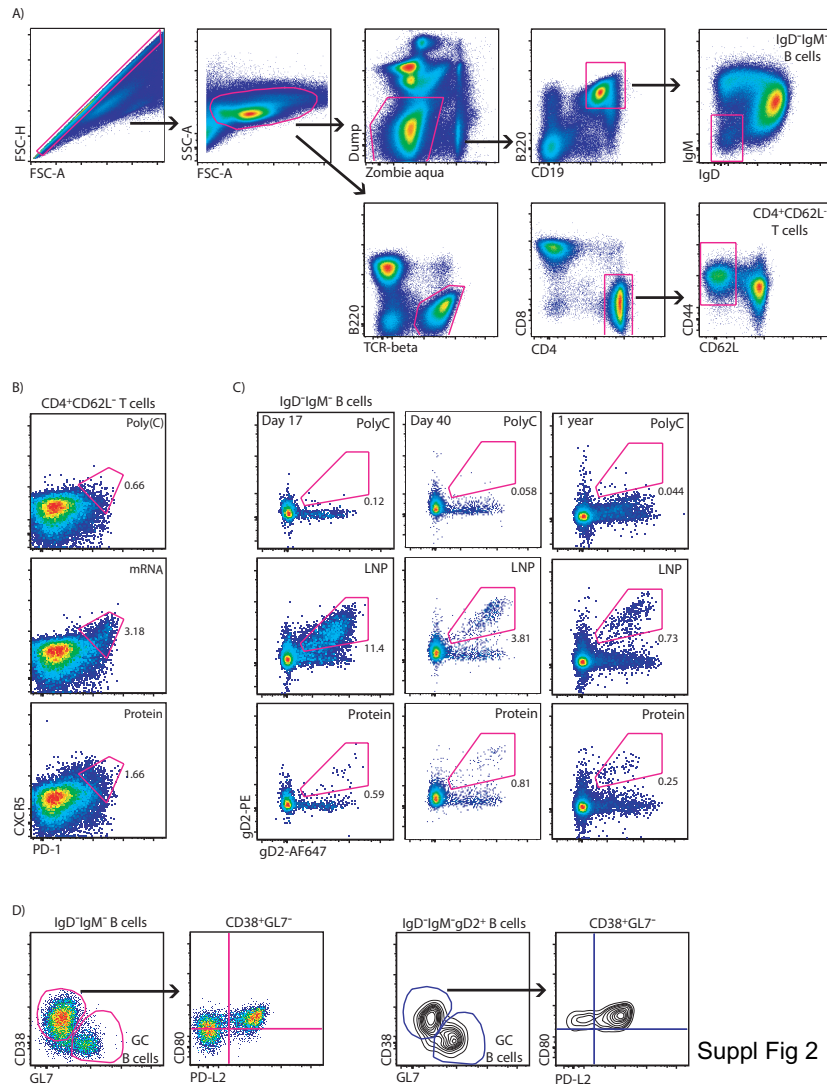

Suppl Fig 2

**Supplementary Figure 2: Murine splenocyte phenotyping and gating strategy.** **A.** Gating strategy to identify switched ( $IgD^-IgM^-$ ) B cells and  $CD4^+CD62L^-$  T cells within splenocytes. **B.** Representative gating of  $T_{FH}$  cells ( $CXCR5^+PD-1^+$ ) within the  $CD4^+CD62L^-$  T cell population for each treatment group at day 17 post immunization. **C.** Identification of gD2+ B cells within the  $IgD^-IgM^-$  B cell population for each treatment group at day 17, day 40 and one-year post immunization. **D.** Gating of germinal center (GC;  $GL7^+CD38^-$ ) and memory ( $GL7^-CD38^+$  and  $CD80^+$  or  $PD-L2^+$ ) subsets within total  $IgD^-IgM^-$  and  $IgD^-IgM^-gD2^+$  B cells.

Suppl. Table 4. Summary of key murine results comparing mRNA and protein T<sub>FH</sub> and gD2<sup>+</sup> B cells

| Condition                             | Day 17,<br>1 immunization      | Day 40,<br>1 immunization      | 1 year, 2 mRNA or<br>3 protein immunizations |
|---------------------------------------|--------------------------------|--------------------------------|----------------------------------------------|
| Number T <sub>FH</sub> cells          | mRNA 2.7-fold<br>higher        | mRNA 2-fold<br>higher          | ND*                                          |
| Number gD2 <sup>+</sup> B<br>cells    | mRNA 118-fold<br>higher        | mRNA 7-fold<br>higher          | mRNA 3.4-fold higher                         |
| Phenotype gD2 <sup>+</sup> B<br>cells | mRNA 95% GC,<br>protein 25% GC | mRNA memory<br>5.1-fold higher | mRNA memory 3.4-<br>fold higher              |

\*ND, not done
